# Supplementary material for: Protic ionic liquids from di- or triamines: even cheaper Brønsted acidic catalysts
Source: Royal Society of Chemistry journal article supplement (doi:10.1039/d1gc00515d), 2021-01-01

## Supplementary Information

### **Protic ionic liquids from di- or triamines: even cheaper Brønsted acidic catalysts**

Alina Brzęczek-Szafran,<sup>\*a</sup> Justyna Więclawik,<sup>a</sup> Natalia Barteczko,<sup>a</sup> Anna Szelwicka,<sup>a</sup> Emily Byrne,<sup>b</sup> Anna Kolanowska,<sup>a</sup> Małgorzata Swadźba Kwaśny,<sup>\*b</sup> Anna Chrobok<sup>a</sup>

<sup>a</sup> Faculty of Chemistry, Silesian University of Technology, Krzywoustego 4, Gliwice, 44-100, Poland

<sup>b</sup> QUILL, School of Chemistry and Chemical Engineering, Queen's University Belfast

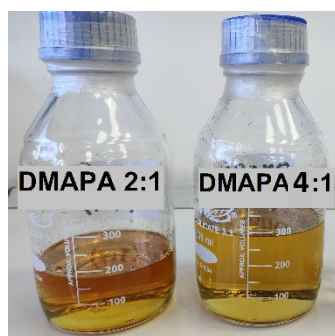

**S1.** Physical appearance of dicationic DMAPA\_2\_1 and DMAPA\_4\_1 ILs based on sulfuric acid synthesized by adding an acid to an amine.

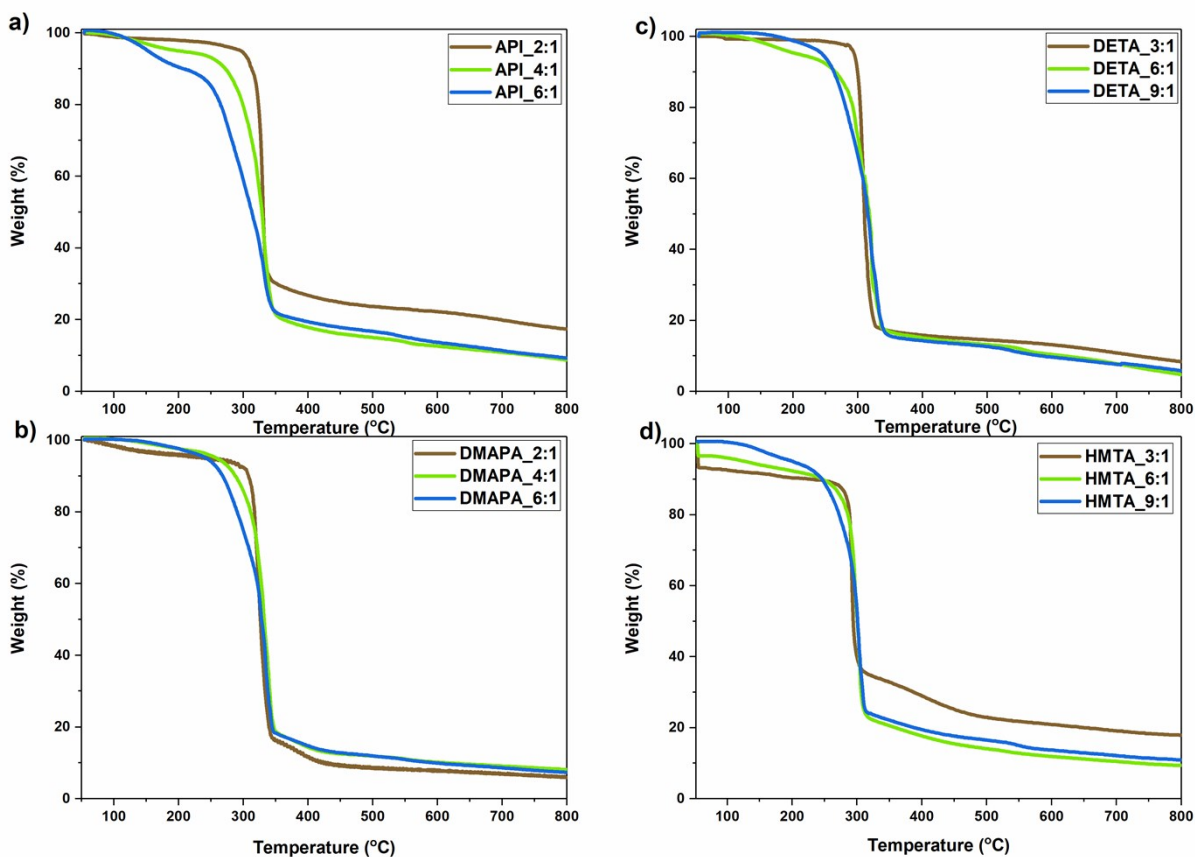

**S2.** Thermogravimetric analysis curves, depicting water loss and thermal decomposition of di- and three-cationic ILs as a function of temperature.

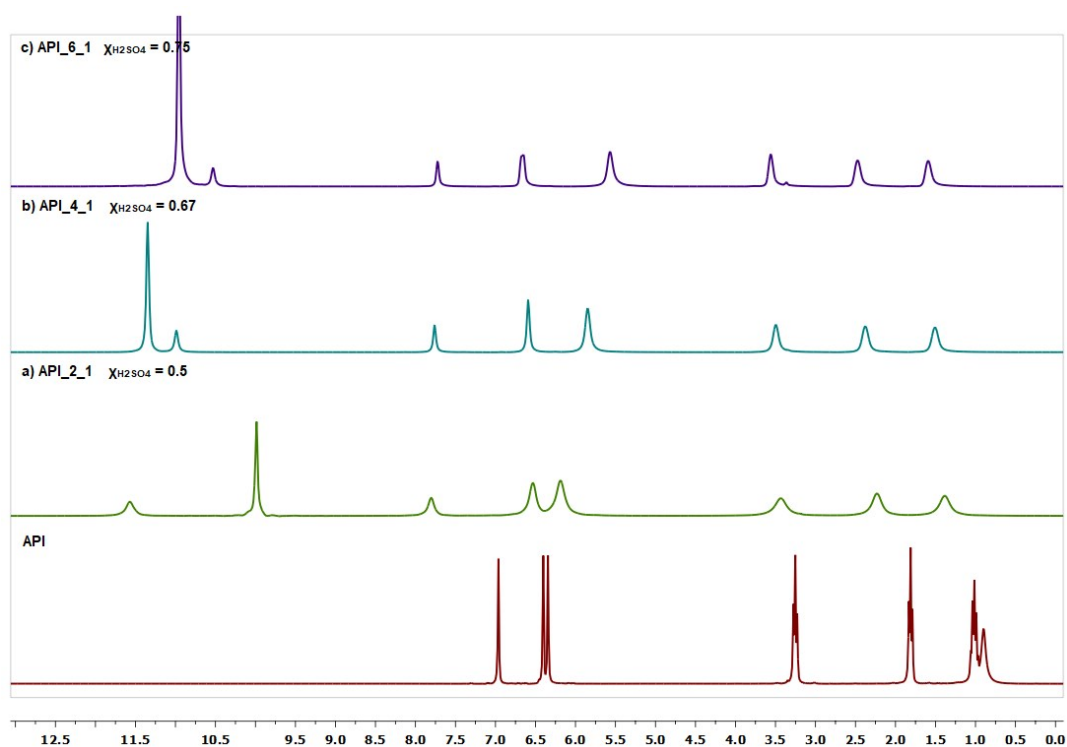

**S3.** <sup>1</sup>H NMR spectra (400.112 MHz, 25 °C, neat) of the systems based on 1-(3-aminopropyl)imidazole (API) and its sulfuric acid mixtures: API\_2\_1 (a), API\_4\_1 (b), API\_6\_1 (c).

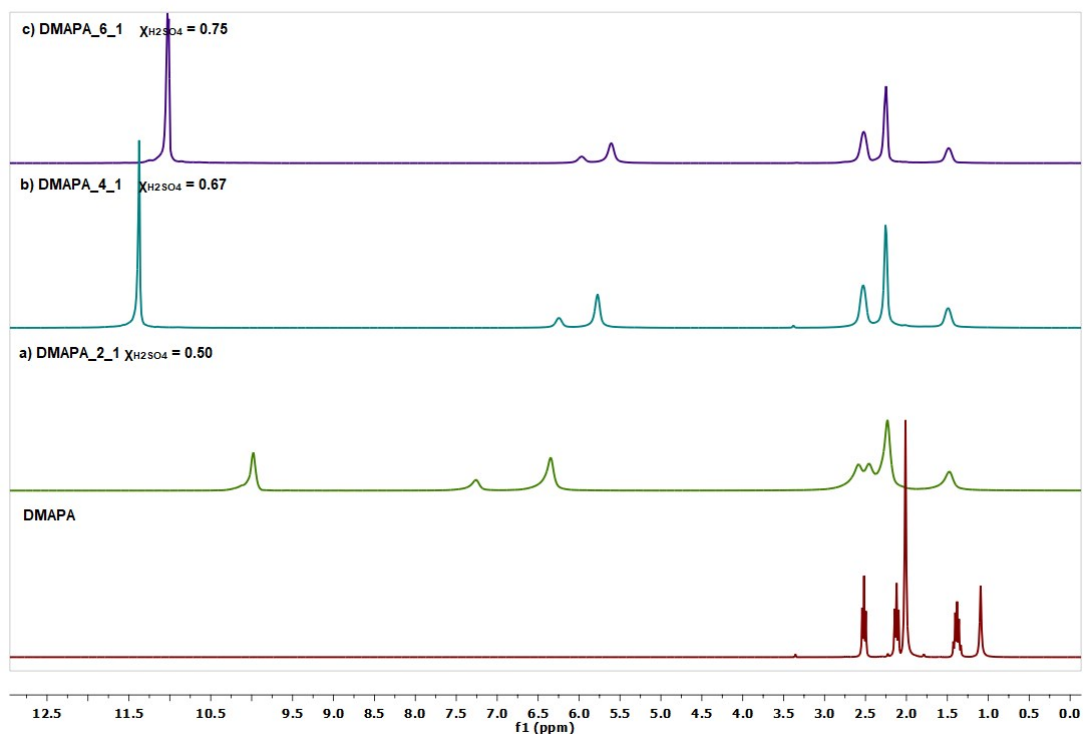

**S4.** <sup>1</sup>H NMR spectra (400.112 MHz, 25 °C, neat) of the systems based on N,N-dimethylaminopropylamine (DMAPA) and its sulfuric acid mixtures: DMAPA\_2\_1 (a), DMAPA\_4\_1 (b), DMAPA\_6\_1 (c)

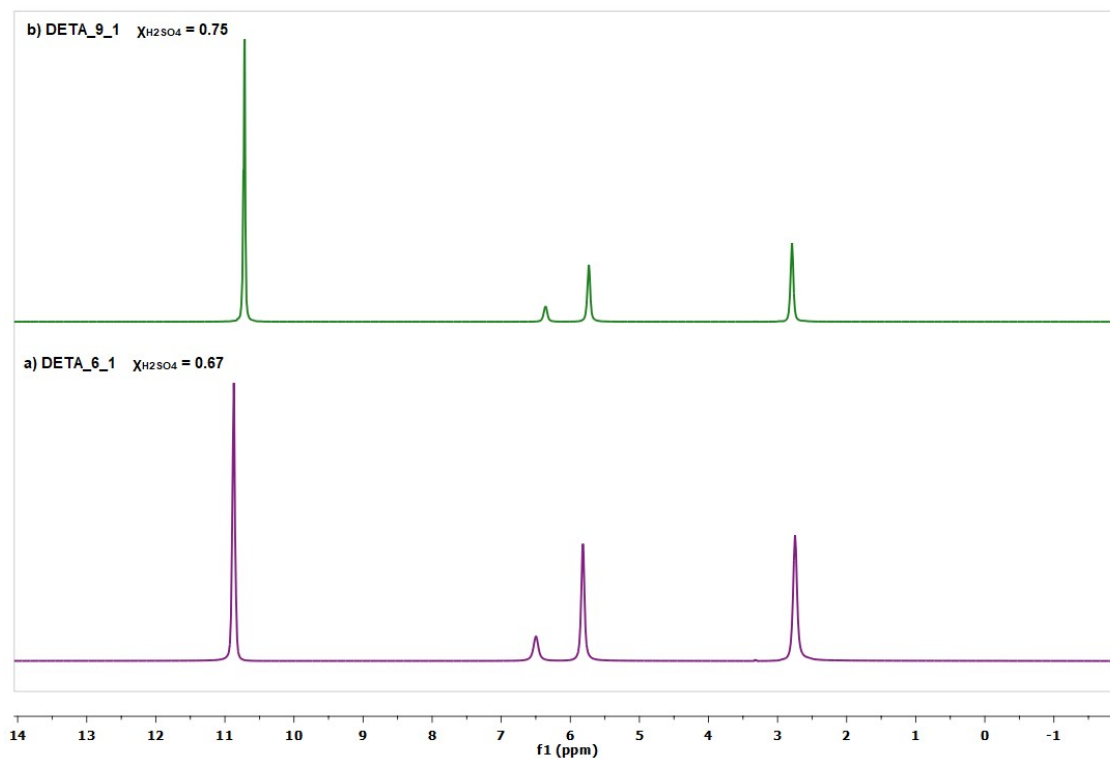

**S5.**  $^1H$  NMR spectra (400.112 MHz, 25 °C, neat) of the systems based on the mixtures of diethylenetriamine and sulfuric acid: DETA\_6\_1 (a), DETA\_9\_1 (b). The neat spectrum of diethylenetriamine was not registered due to the solid state of a base at RT.

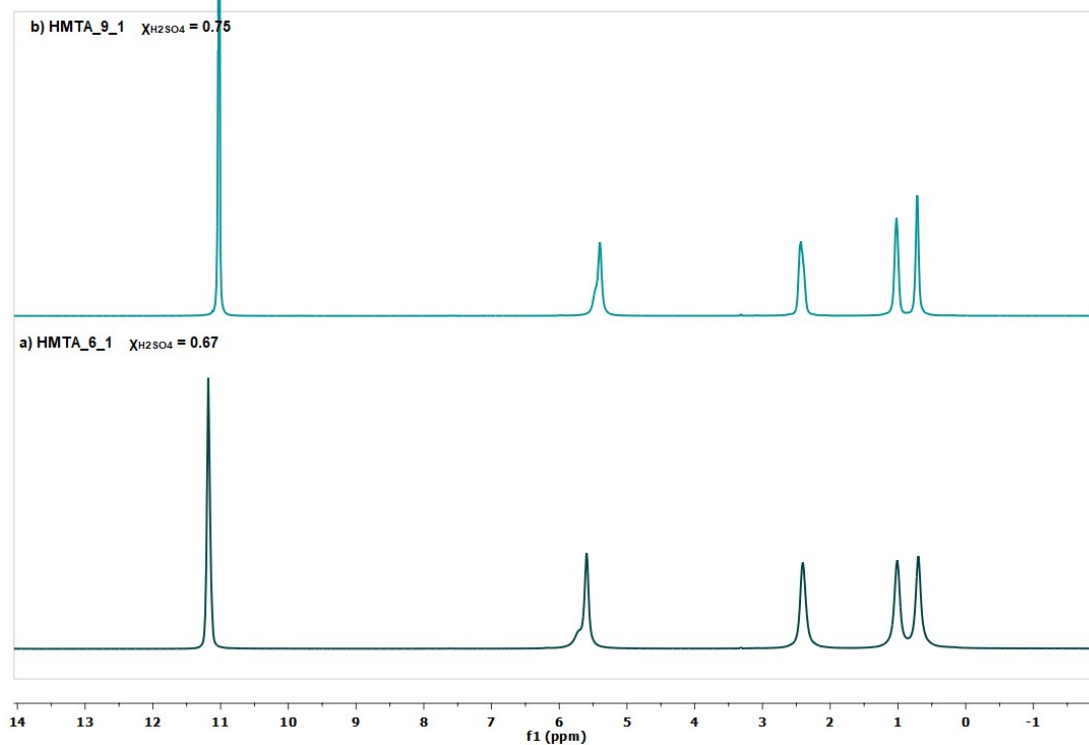

**S6.**  $^1H$  NMR spectra (400.112 MHz, 25 °C, neat) of the systems based on the mixtures of bis(hexamethylene)triamine and sulfuric acid: HMTA\_6\_1 (a), HMTA\_9\_1 (b). The neat spectrum of bis(hexamethylene)triamine was not registered due to the solid state of a base at RT.

S7. Viscosity and density values registered at 25, 50 and 80 °C for di- and three-cationic ILs.

| Mixture   | 25 °C          |                             | 50 °C          |                             | 80 °C          |                             |
|-----------|----------------|-----------------------------|----------------|-----------------------------|----------------|-----------------------------|
|           | $\eta$ (mPa s) | $\rho$ (kg/m <sup>3</sup> ) | $\eta$ (mPa s) | $\rho$ (kg/m <sup>3</sup> ) | $\eta$ (mPa s) | $\rho$ (kg/m <sup>3</sup> ) |
| DMAPA_2_1 | 16560*         | 1.5                         | 3762           | 1.49                        | 707            | 1.48                        |
| DMAPA_4_1 | 307            | 1.63                        | 109            | 1.61                        | 67             | 1.59                        |
| DMAPA_6_1 | 104            | 1.69                        | 44             | 1.67                        | 19             | 1.65                        |
| API_2_1   | 28914*         | 1.58                        | 5051           | 1.57                        | 614            | 1.55                        |
| API_4_1   | 385            | 1.68                        | 133            | 1.88                        | 50             | 1.64                        |
| API_6_1   | 120            | 1.72                        | 49             | 1.71                        | 22             | 1.68                        |
| DETA_3_1  | -              | -                           | -              | -                           | -              | -                           |
| DETA_6_1  | 875            | 1.82                        | 245            | 1.80                        | 78             | 1.78                        |
| DETA_9_1  | 206            | 1.84                        | 77             | 1.82                        | 30             | 1.79                        |
| HMTA_3_1  | -              | 1.41                        | -              | 1.40                        | 664            | 1.39                        |
| HMTA_6_1  | 1067           | 1.55                        | 328            | 1.53                        | 110            | 1.51                        |
| HMTA_9_1  | 245            | 1.62                        | 93             | 1.60                        | 38             | 1.58                        |

\*Estimated values, values beyond the measurement range.

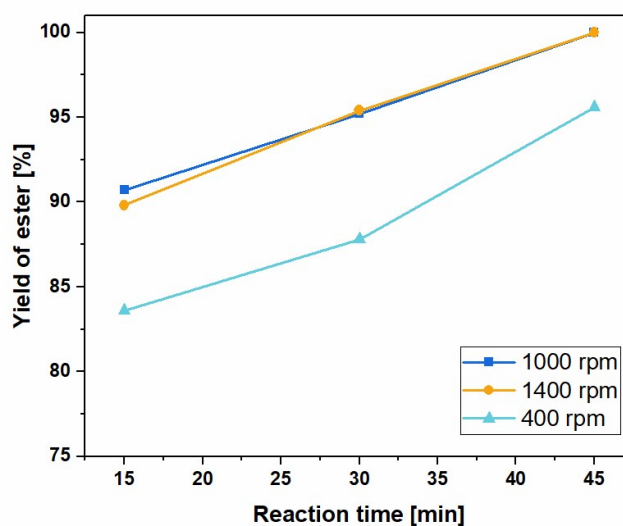

S8. Effect of a different stirring speed on the yield of methyl oleate using triamino protic ionic liquid mixture HMTA\_9\_1 as the catalyst. Reaction conditions: 60 °C, methanol/oleic acid molar ratio: 10:1, catalyst loading: 5 mol %.

S9. Retention times of investigated esters on GC analysis.

|                  |          |    |
|------------------|----------|----|
| methyl oleate    | 7.57 min | a) |
| methyl palmitate | 7.06 min | b) |
| methyl stearate  | 7.55 min | c) |
| methyl laureate  | 6.02 min | d) |

Retention time of decane: 3.73

a)

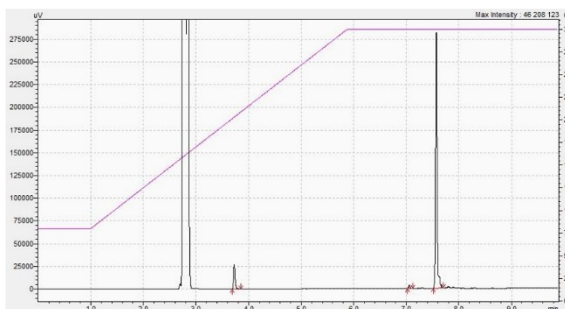

b)

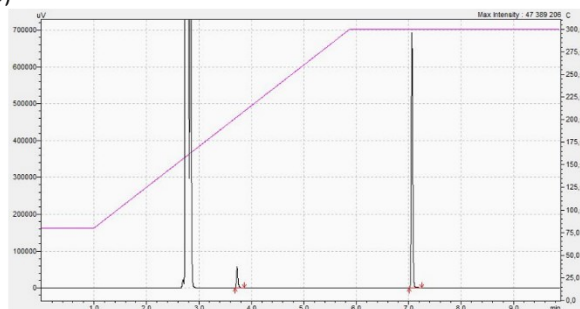

c)

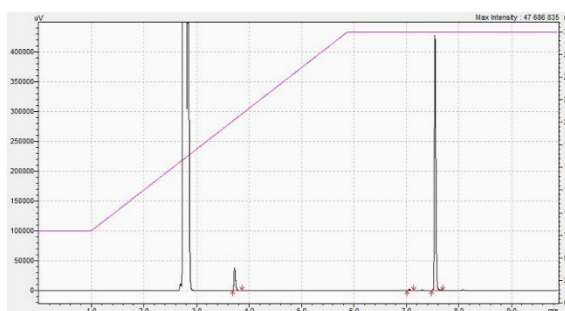

d)

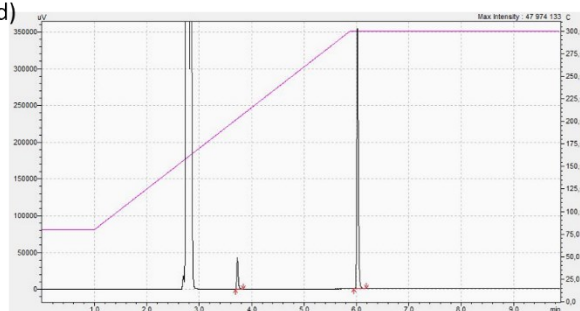

Supplement: d1gc00515d1.pdf [file d1gc00515d1.pdf]
